# Supplementary material for: Dinitrogen Fixation Is Restricted to the Terminal Heterocysts in the Invasive Cyanobacterium Cylindrospermopsis raciborskii CS-505
Source: PLoS One. 2013 Feb 6;8(2):e51682. doi: 10.1371/journal.pone.0051682 (PMC3566145; doi:10.1371/journal.pone.0051682)
Supplement: Table S3 — Nucleotide sequences of primers used in this study. Primer names, sequence and target locus tag in C. raciborskii are shown (gene name is given in parentheses). (DOC) [file pone.0051682.s005.doc]

Primer
Sequence (5’-3’)
Gene Target
CS505nifHF
GGCTGCTGAGAAAGGTGCTGT
CRC_02887 (nifH)
CS505nifHR
ACCACGACCAGCACAACCT
CRC_02887 (nifH)
CS505devAF
TTAAGTTATGGTGGAGGAGTCG
CRC_00436 (devA)
CS505devAR
GTTACCCATGATAATCGCATCC
CRC_00436 (devA)
CS505hglDF
AGCCATTATTGGATTATCATGTCTC
CRC_02049 (hglD)
CS505hglDR
TGGCAGTTGCATCCTTTTCTTG
CRC_02049 (hglD)
RBD916SF
CCGCCAGCTTTTCAGAATAC
16S rRNA gene
RBD916SR
CTCAAGCGGCTCTAATTTGC
16S rRNA gene
CS505ftsZF
GGTAATCCCTCCATTGGTCAA
CRC_03281 (ftsZ)
CS505ftsZR
AGCACCCGTACCTGTACCAC
CRC_03281 (ftsZ)
